# Supplementary material for: Lignocellulosic Biomasses from Agricultural Wastes Improved the Quality and Physicochemical Properties of Frying Oils
Source: MDPI journal article supplement (doi:10.3390/foods11193149), 2022-10-10
Supplement: s1 [file s1]

*Article*

# Lignocellulosic Biomasses from Agricultural Wastes Improved the Quality and Physicochemical Properties of Frying Oils

Eman Ahmed <sup>1,\*</sup>, Ashraf Zeitoun <sup>1</sup>, Gamal Hamad <sup>2</sup>, Mohamed A. M. Zeitoun <sup>1</sup>, Ahmed Taha <sup>1,3</sup>, Sameh A. Korma <sup>4,5</sup> and Tuba Esatbeyoglu <sup>6,\*</sup>

<sup>1</sup> Department of Food Science, Faculty of Agriculture (Saba Basha), Alexandria University, Alexandria 21531, Egypt

<sup>2</sup> Department of Food Technology, Arid Lands Cultivation Research Institute (ALCRI), City of Scientific Research and Technological Applications (SRTA City), New Borg El-Arab 21934, Egypt

<sup>3</sup> Department of Functional Materials and Electronics, Center for Physical Sciences and Technology, Saulėtekio al. 3, 10257 Vilnius, Lithuania

<sup>4</sup> Department of Food Science, Faculty of Agriculture, Zagazig University, Zagazig 44519, Egypt

<sup>5</sup> School of Food Science and Engineering, South China University of Technology, Guangzhou 510641, China

<sup>6</sup> Department of Food Development and Food Quality, Institute of Food Science and Human Nutrition, Gottfried Wilhelm Leibniz University Hannover, Am Kleinen Felde 30, 30167 Hannover, Germany

\* Correspondence: eman-abdelaziz@alexu.edu.eg (E.A.); esatbeyoglu@lw.uni-hannover.de (T.E.); Tel.: +20-1212484089 (E.A.); +49-5117625589 (T.E.)

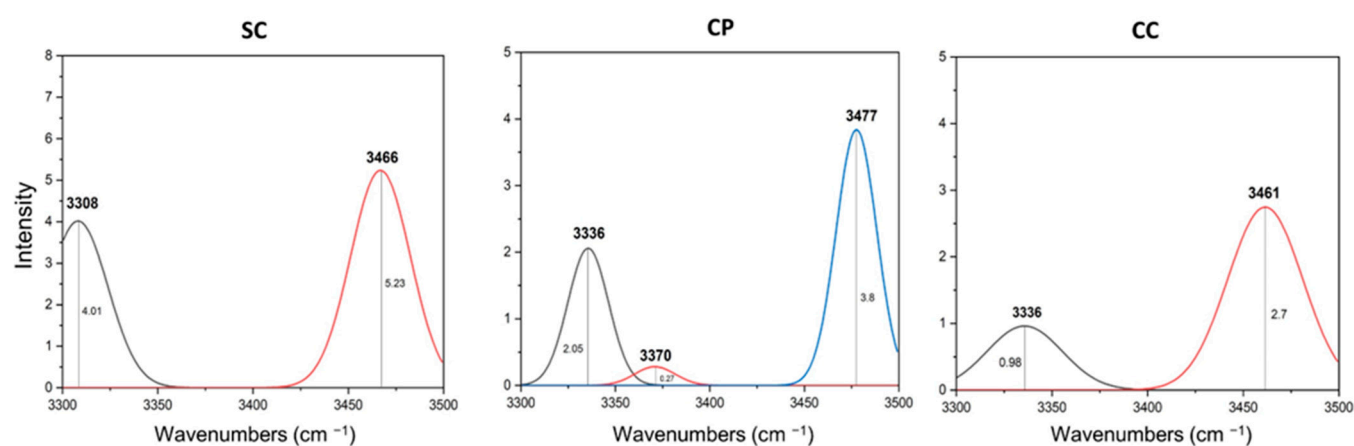

**Figure S1.** Fitted peaks of FTIR spectra at 3300 - 3500  $\text{cm}^{-1}$  of lignocellulosic biomasses, including corn cob (CC), cornstalk piths (CP) and sugarcane bagasse (SC).

**Table S1.** Lorentz components of fitted peaks of lignocellulosic biomasses, including corn cob (CC), cornstalk piths (CP) and sugarcane bagasse (SC).

|                             | Peak 1 |        |        | Peak 2 |       |       |
|-----------------------------|--------|--------|--------|--------|-------|-------|
|                             | SC     | CC     | CP     | SC     | CC    | CP    |
| Center ( $\text{cm}^{-1}$ ) | 3466   | 3461   | 3477   | 3308   | 3336  | 3336  |
| Hight (intensity)           | 5.23   | 2.70   | 3.84   | 4.01   | 0.98  | 2.05  |
| FWHM                        | 36.85  | 46.23  | 25.32  | 36.85  | 46.23 | 25.31 |
| Area                        | 205.46 | 135.18 | 103.40 | 157.58 | 47.31 | 55.48 |

FWHM, Full width half maximum.
